# Supplementary material for: Biocultural dynamics and morphological variation of Laelia albida Bateman ex Lindl. (Orchidaceae) in traditional systems of the Tehuacán Valley, Mexico
Source: Research Square preprint supplement (doi:10.21203/rs.3.rs-7633511/v1), 2025-09-24
Supplement: Supplementary file 1 [file db53a6917f48e606fbdac90c.docx]

**Table S1** Analysis of variance (ANOVA) for the 55 morphological variables of Laelia albida in the Tehuacán Valley.

|  | | | | | | | | | |
| --- | --- | --- | --- | --- | --- | --- | --- | --- | --- |
| Variable | Mean | Coefficient  of  variation | Mean Square | | Variable | Mean | Coefficient  of  variation | Mean Square | | |
| **Accessions** | **Error** |  |  |  | **Accessions** | **Error** |
| BASAL REGION | | | | | **BASAL REGION** | | | | | |
| A1 | 2.010 | **4.185** | 0.134*** | 0.007 | **B3** | 0.309 | **8.482** | 0.004*** | 0.000 |
| A2 | 0.440 | **9.913** | 0.027*** | 0.001 | **B4** | 0.744 | **6.155** | 0.065*** | 0.002 |
| A3 | 0.341 | **14.472** | 0.024*** | 0.002 | **B5** | 0.755 | **5.778** | 0.075*** | 0.001 |
| A4 | 1.380 | **5.367** | 0.268*** | 0.005 | **C1** | 0.299 | **7.732** | 0.006*** | 0.000 |
| A5 | 0.344 | **13.584** | 0.019*** | 0.002 | **C2** | 1.524 | **4.650** | 0.225*** | 0.005 |
| A6 | 0.428 | **12.419** | 0.024*** | 0.002 | **C3** | 0.297 | **8.292** | 0.006*** | 0.000 |
| A7 | 0.741 | **0.216** | 0.061*** | 0.002 | **C4** | 0.820 | **4.629** | 0.053*** | 0.001 |
| A8 | 0.758 | **6.121** | 0.076*** | 0.002 | **C5** | 0.812 | **5.233** | 0.052*** | 0.001 |
| B1 | 0.313 | **8.473** | 0.005*** | 0.000 | **C6** | 0.825 | **5.623** | 0.066*** | 0.002 |
| B2 | 1.538 | **4.175** | 0.195*** | 0.004 | **C7** | 0.821 | **7.991** | 0.064*** | 0.004 |
| MIDDLE REGION | | | |  |  | **APICAL REGION** | | | |
| D1 | 0.184 | **51.721** | 0.051*** | 0.009 | **F4** | 0.643 | **5.973** | 0.045*** | 0.001 |
| D2 | 1.458 | **8.836** | 0.280*** | 0.016 | **F5** | 0.683 | **5.801** | 0.022*** | 0.001 |
| D3 | 0.167 | **16.142** | 0.005*** | 0.000 | **F6** | 0.696 | **5.962** | 0.026*** | 0.001 |
| D4 | 0.185 | **23.780** | 0.008*** | 0.001 | **F7** | 0.645 | **6.187** | 0.054*** | 0.001 |
| D5 | 0.179 | **27.574** | 0.007*** | 0.002 | **G1** | 0.282 | **8.793** | 0.014*** | 0.000 |
| D6 | 0.284 | **12.387** | 0.011*** | 0.001 | **G2** | 1.079 | **6.709** | 0.071*** | 0.005 |
| E1 | 0.181 | **58.393** | 0.038*** | 0.011 | **G3** | 0.279 | **8.041** | 0.015*** | 0.000 |
| E2 | 1.156 | **11.720** | 0.303*** | 0.018 | **G4** | 0.687 | **6.164** | 0.023*** | 0.001 |
| E3 | 0.159 | **24.636** | 0.003* | 0.001 | **G5** | 0.600 | **7.268** | 0.012*** | 0.001 |
| E4 | 0.162 | **21.472** | 0.009*** | 0.001 | **G6** | 0.606 | **7.906** | 0.016*** | 0.002 |
| E5 | 0.177 | **26.194** | 0.008*** | 0.002 | **G7** | 0.692 | **5.545** | 0.026*** | 0.001 |
| E6 | 0.144 | **20.613** | 0.005*** | 0.000 | **H1** | 0.219 | **21.938** | 0.006* | 0.002 |
| E7 | 0.140 | **24.606** | 0.005*** | 0.001 | **H2** | 0.167 | **30.443** | 0.007* | 0.002 |
| E8 | 0.175 | **22.430** | 0.008*** | 0.001 | **H3** | 0.602 | **8.040** | 0.014*** | 0.002 |
| E9 | 0.183 | **25.953** | 0.007*** | 0.002 | **H4** | 0.416 | **11.740** | 0.011*** | 0.002 |
| F1 | 0.279 | **30.448** | 0.029*** | 0.007 | **H5** | 0.421 | **14.096** | 0.012*** | 0.003 |
| F2 | 1.266 | **8.344** | 0.116*** | 0.011 | **H6** | 0.595 | **9.124** | 0.013*** | 0.002 |
| F3 | 0.269 | **16.392** | 0.018*** | 0.001 |  |  |  |  |  |

***=*P*≤0.05,***=*P*≤0.0001**

**CV: High CV: Intermediate CV: Low**

**Table S2.** Eigenvalues and cumulative proportion of variance explained by the first three principal components (PCs) for the 55 labellum morphological variables of *Laelia albida*.

| **Valores propios** | **PC1** | **PC2** | **PC3** |
| --- | --- | --- | --- |
| Eigenvalue | 25.832 | 5.561 | 3.668 |
| Variance (%) | 46.966 | 10.110 | 6.669 |
| Accumulative variance (%) | 46.966 | 57.077 | **63.746** |

**
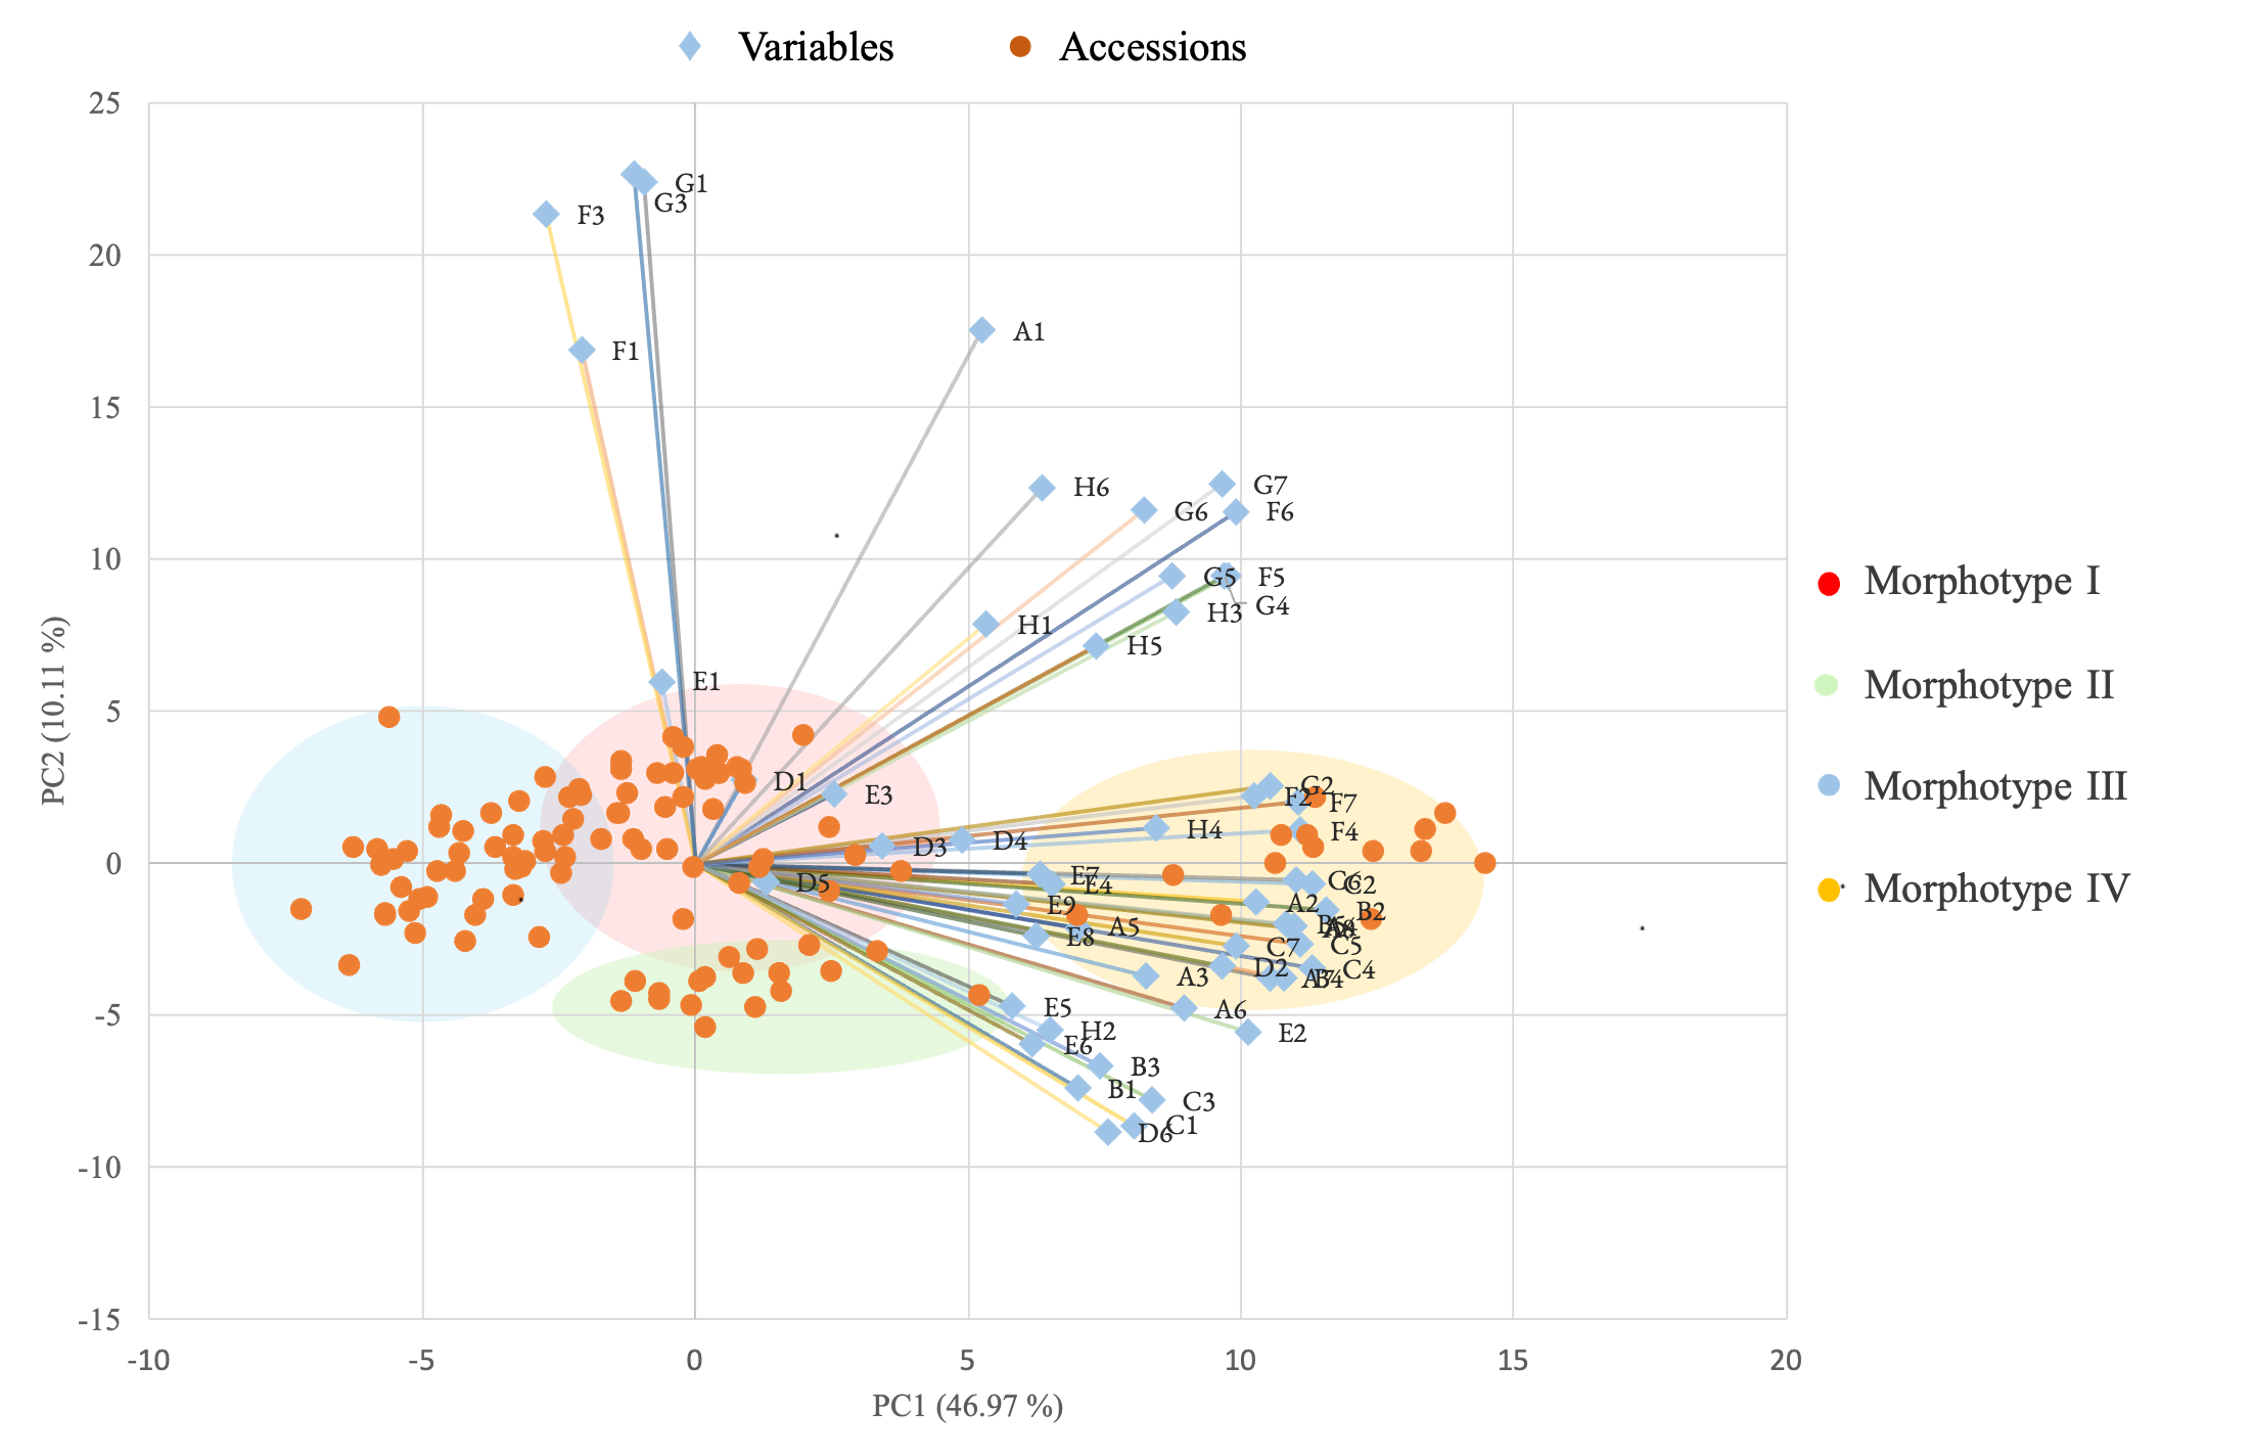
**

**Figure S1** Spatial distribution of morphotypes in Laelia albida populations and the morphological variables with the highest loadings on the principal components (PC). Blue diamonds denote morphological variables, and orange circles denote accessions grouped by morphotype. Each morphotype is delineated with an arbitrary color for visual distinction.


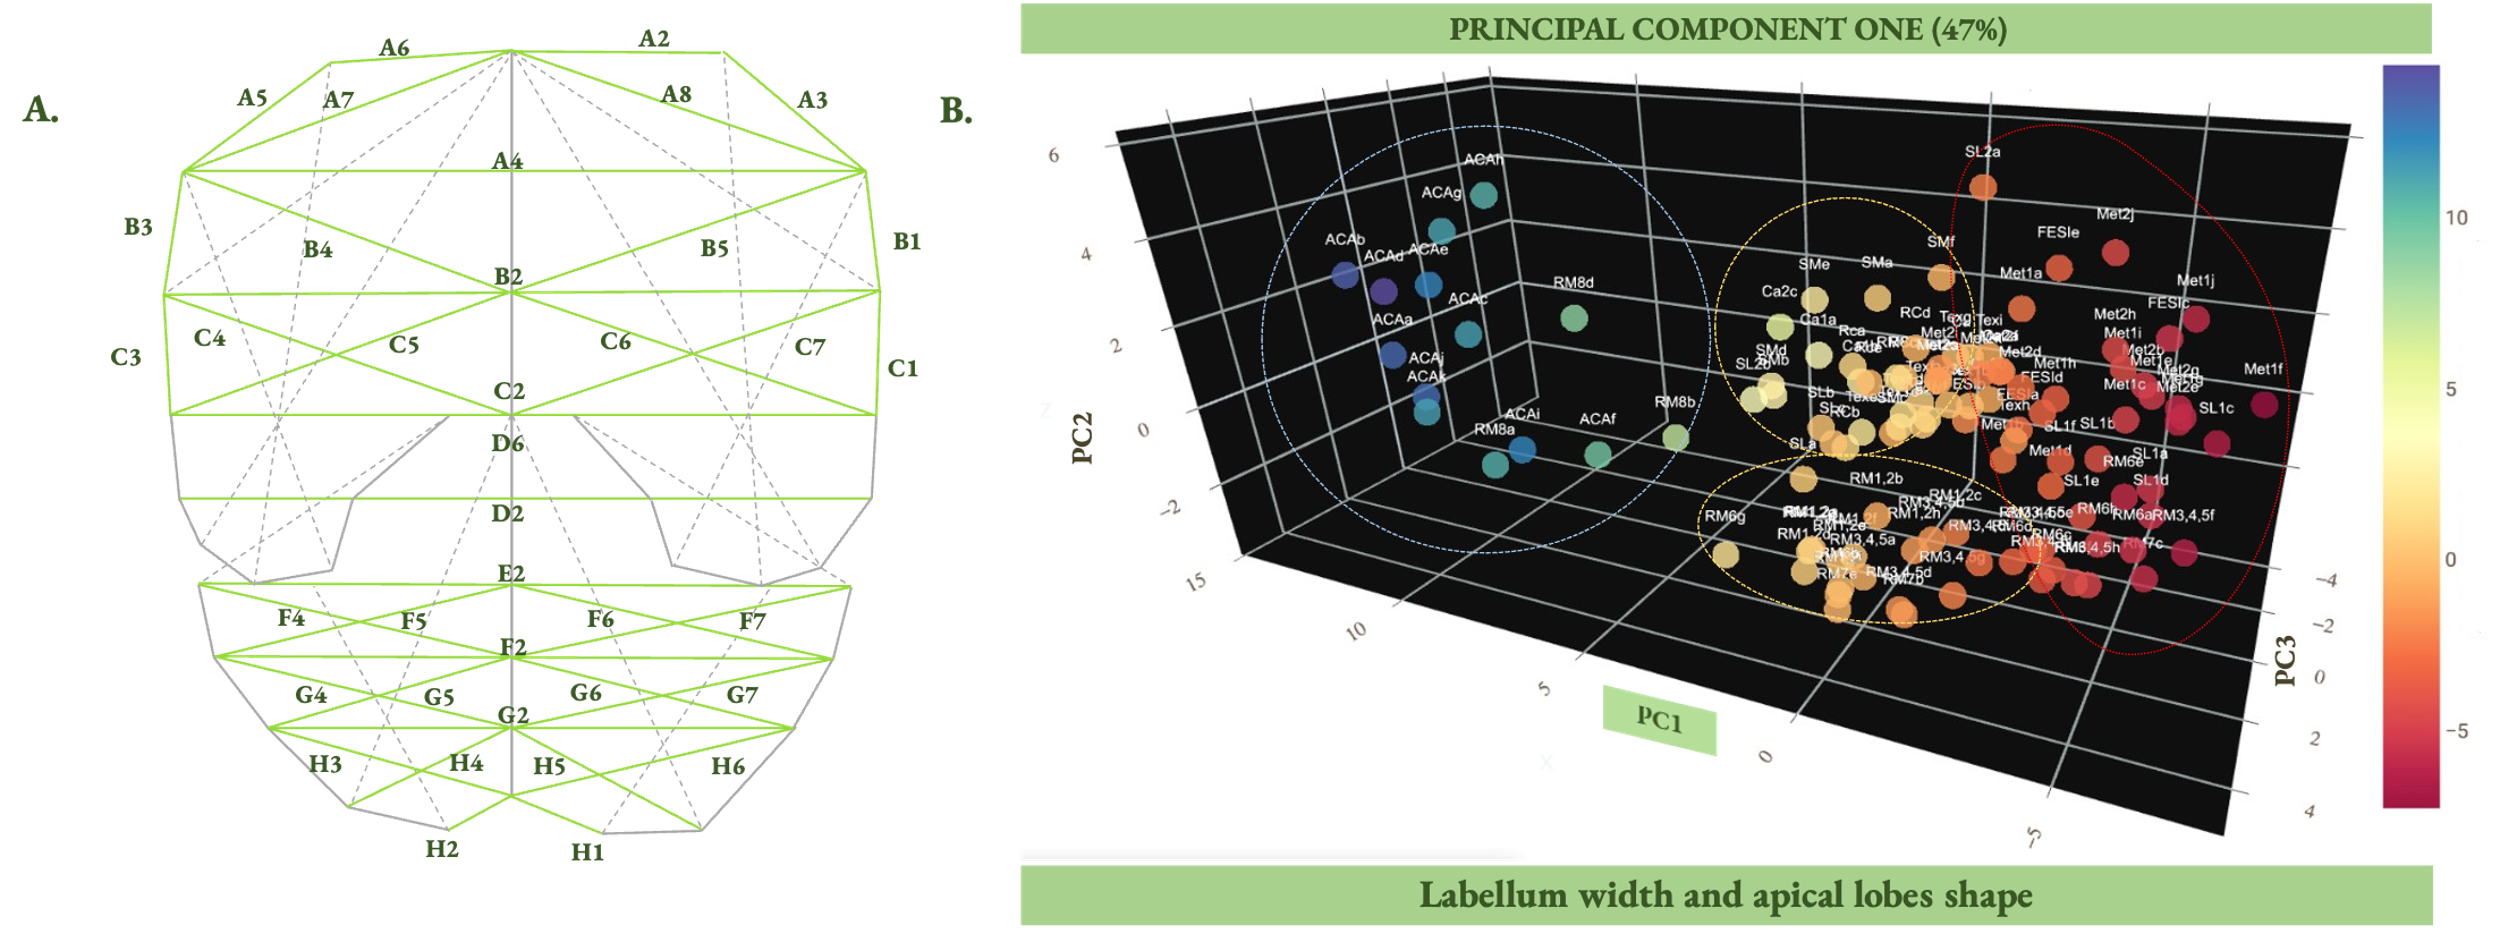


**Figure S2** Distribution of the 110 *Laelia albida* accessions along the first principal component (PC1). (A) Morphological variables of the labellum grouped within PC1. (B) Distribution of accessions according to their PC1 scores. The color bar indicates values, with the highest in the violet spectrum and the lowest in the red spectrum, highlighting three groups ordered according to the color gradient.


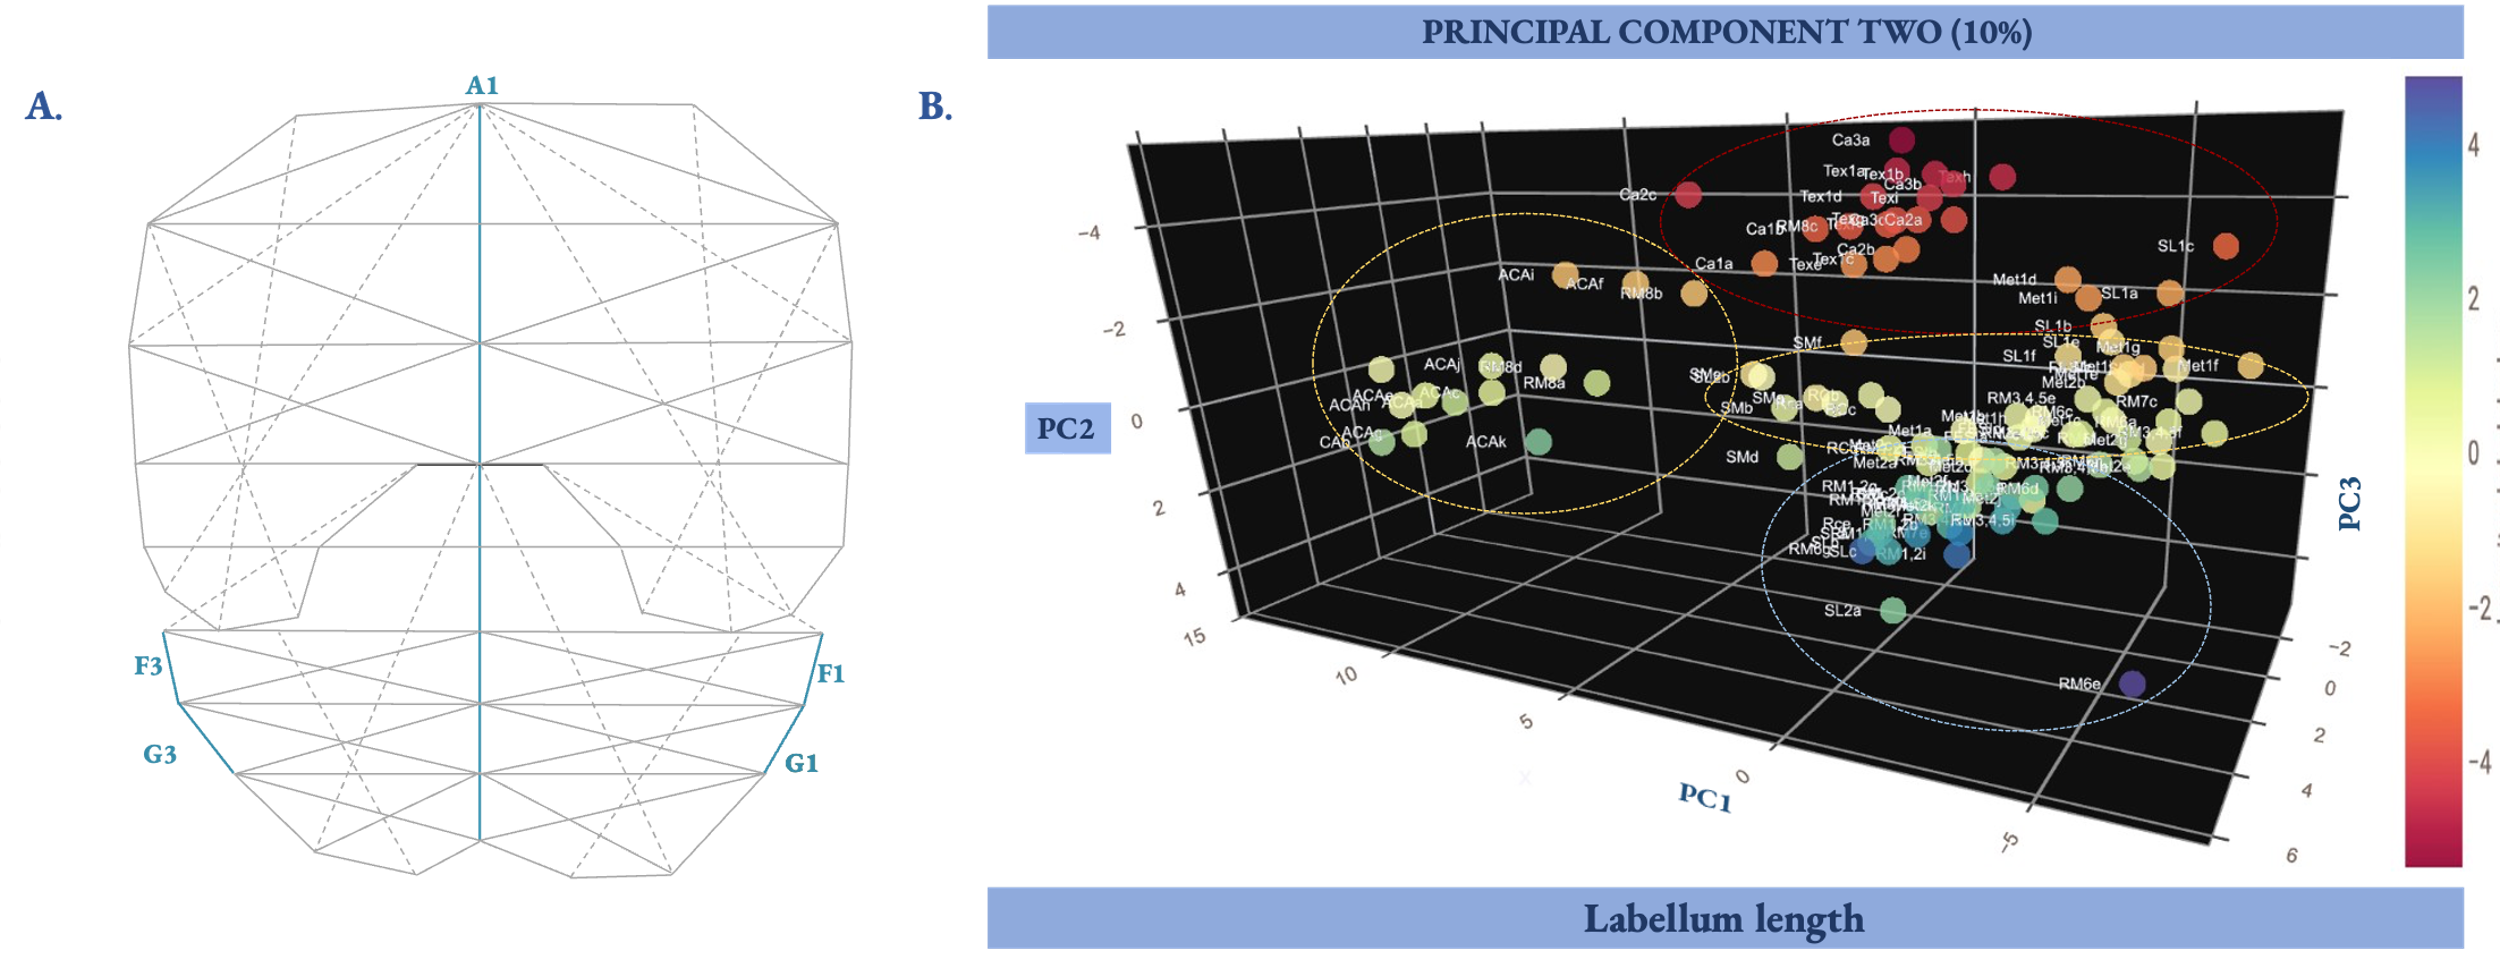


**Figure S3** Distribution of the 110 *Laelia albida* accessions along the second principal component (PC2). (A) Morphological variables of the labellum grouped within PC2. (B) Distribution of accessions according to their PC2 scores. The color bar indicates values, with the highest in the violet spectrum and the lowest in the red spectrum, highlighting three groups ordered according to the color gradient.


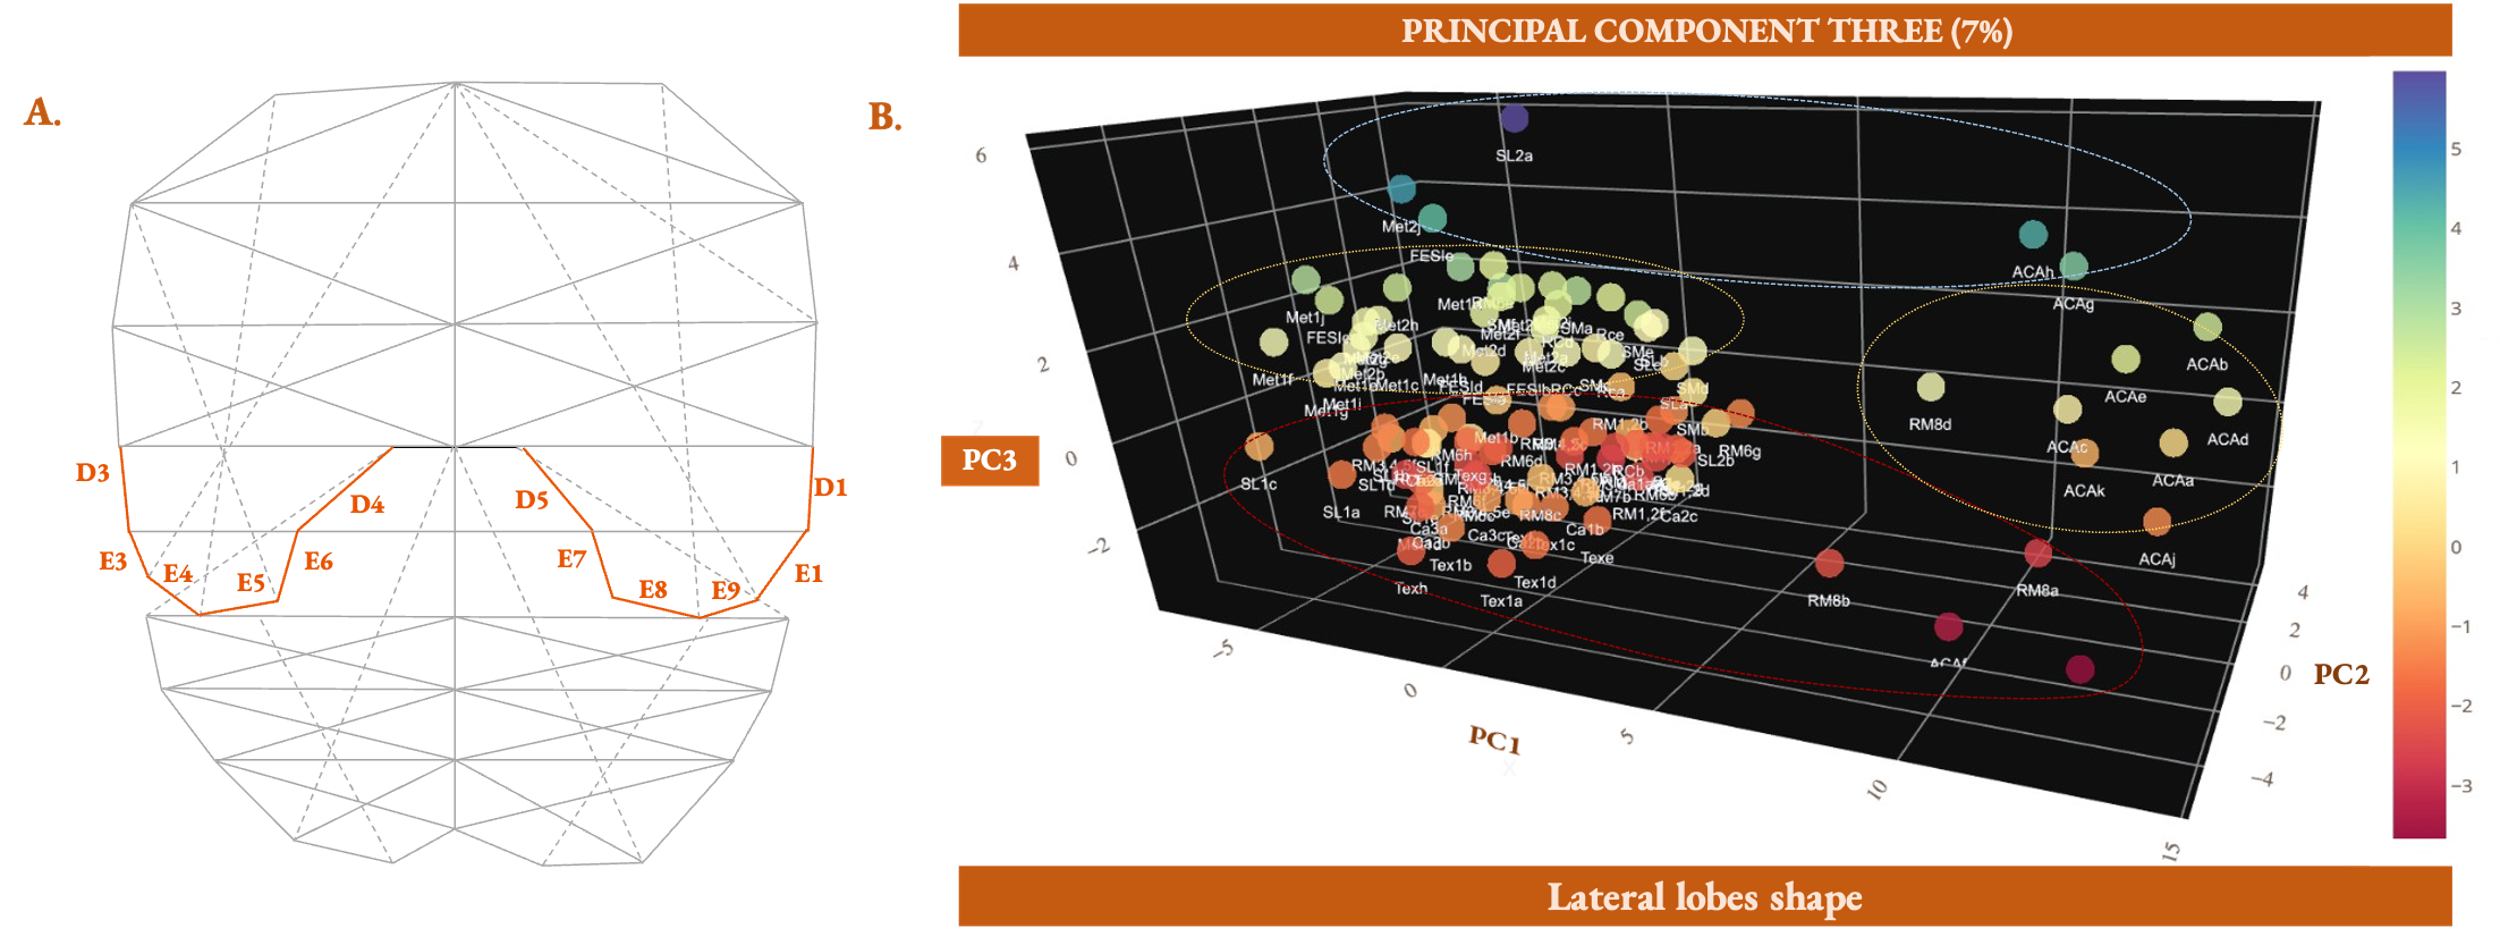


**Figure S4** Dispersion of the 110 *Laelia albida* accessions along the third principal component (PC3). (A) Morphological variables of the labellum grouped within PC3. (B) Distribution of accessions according to their PC3 scores. The color bar indicates values, with the highest in the violet spectrum and the lowest in the red spectrum, highlighting three groups ordered according to the color gradient.


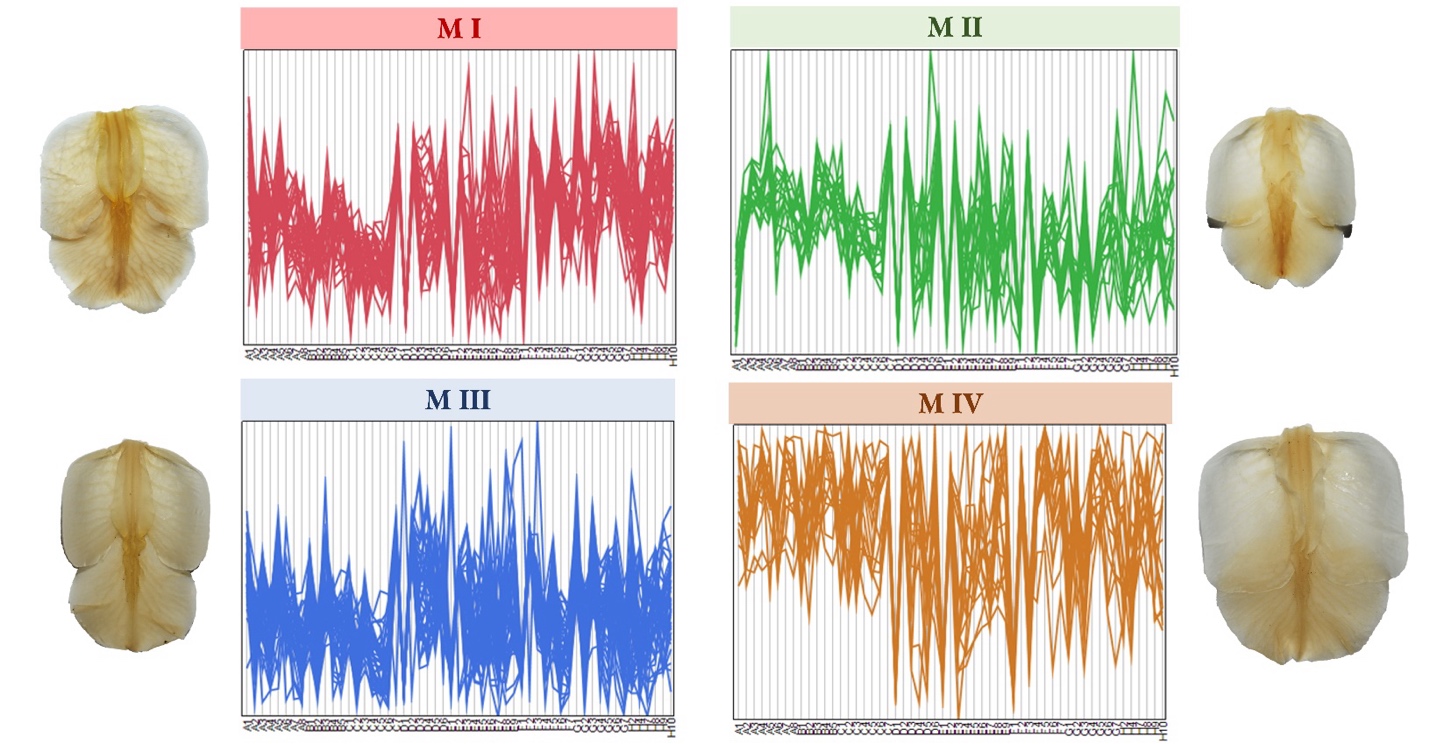


**Figure S5** Morphological expression profile of the Laelia albida labellum variables for each morphotype. The number of lines corresponds to the number of accessions included in each morphotype; therefore, Morphotypes I and III present the highest number of lines.
